# Supplementary material for: Improving poling efficiency by synthesizing a nonlinear optical chromophore containing two asymmetric non-conjugated D–π–A chains
Source: Royal Society of Chemistry journal article supplement (doi:10.1039/c4ra12656d), 2015-01-01
Supplement: c4ra12656d1.pdf [file c4ra12656d1.pdf]

**Table 3** UV-Vis absorption data of chromophores (Absorption spectra are measured in  $10^{-5}$  M solutions)

| Chromophore | Solvent      | $\lambda_{\text{max}}$ | $\Delta \lambda/(\text{nm})^{\text{a}}$ | FWHM/nm |
|-------------|--------------|------------------------|-----------------------------------------|---------|
| C1          | Acetone      | 623                    | 31                                      | 82      |
|             | Toluene      | 598                    | 6                                       | 84      |
|             | Acetonitrile | 627                    | 35                                      | 77      |
|             | DMF          | 636                    | 44                                      | 77      |
|             | 1, 4-Dioxane | 592                    | 0                                       | 94      |
|             | Chloroform   | 622                    | 10                                      | 63      |
| C2          | Acetone      | 463                    | 11                                      | 48      |
|             | Toluene      | 454                    | 2                                       | 42      |
|             | Acetonitrile | 463                    | 11                                      | 48      |
|             | DMF          | 470                    | 18                                      | 49      |
|             | 1, 4-Dioxane | 452                    | 0                                       | 46      |
|             | Chloroform   | 464                    | 12                                      | 43      |
| C3          | Acetone      | 624                    | 26                                      | 84      |
|             | Toluene      | 605                    | 7                                       | 91      |
|             | Acetonitrile | 629                    | 31                                      | 79      |
|             | DMF          | 636                    | 38                                      | 78      |
|             | 1, 4-Dioxane | 598                    | 0                                       | 98      |
|             | Chloroform   | 623                    | 25                                      | 67      |

$\Delta \lambda/(\text{nm})^{\text{a}} = \lambda_{\text{max}}(\text{solvent}) - \lambda_{\text{max}}(1, 4\text{-Dioxane})$
